# Supplementary material for: Interfacial engineering of FeWO4/Fe2O3 homometallic heterojunctions for synergistic electrocatalytic water splitting
Source: Royal Society of Chemistry journal article supplement (doi:10.1039/d3qi00519d), 2023-01-01
Supplement: d3qi00519d1.pdf [file d3qi00519d1.pdf]

1  
2  
3  
4  
5  
6  
7  
8  
9  
10  
11  
12  
13  
14  
15  
16  
17  
18  
19  
20  
21  
22  
23

## Supporting Information

# Interfacial Engineering of FeWO<sub>4</sub>/Fe<sub>2</sub>O<sub>3</sub> Homometallic Heterojunction for Synergistic Electrocatalytic Water Splitting

Rongfang Li,<sup>a</sup> Heng Zhang,<sup>a,b\*</sup> Junling Chen<sup>c</sup>, Ka Zhang<sup>a,b</sup>, Wenqiang Li<sup>a</sup>,  
Xun Feng,<sup>a,\*</sup> Huijuan Zhang,<sup>a</sup> Abdoukader Ibro Douka,<sup>d\*</sup> Xu Zhang,<sup>d</sup>  
Tiexin Zhang<sup>d,\*</sup>

<sup>a</sup> College of Chemistry and Chemical Engineering, Luoyang Normal University,  
Luoyang, 471934, P. R. China

<sup>b</sup> College of Chemistry, Zhengzhou University, Zhengzhou, 450001, P. R. China

<sup>c</sup> School of Biochemistry and Chemical Engineering, Nanyang Institute of  
Technology, Nanyang, 473601, P. R. China

<sup>d</sup> State Key Laboratory of Fine Chemicals, School of Chemical Engineering, School  
of Chemistry, Dalian University of Technology, Dalian 116024, P. R. China

*\*Corresponding authors E-mail:*

[honzhangheng95@163.com](mailto:honzhangheng95@163.com)

[fengx@lynu.edu.cn](mailto:fengx@lynu.edu.cn)

[akimdouka@dlut.edu.cn](mailto:akimdouka@dlut.edu.cn)

[zhangtiexin@dlut.edu.cn](mailto:zhangtiexin@dlut.edu.cn)

|    |                                                   |     |
|----|---------------------------------------------------|-----|
| 1  | <b>S1. Experimental section</b> .....             | S3  |
| 2  | <b>S1.1 Material characterizations</b> .....      | S3  |
| 3  | <b>S1.2 Electrochemical measurements</b> .....    | S4  |
| 4  | <b>S1.3 ECSA calculation</b> .....                | S5  |
| 5  | <b>S1.4 Turnover frequency calculations</b> ..... | S5  |
| 6  | <b>S1.5 Theoretical calculation</b> .....         | S6  |
| 7  | <b>S2. Supplementary Figures and Table</b> .....  | S9  |
| 8  | <b>Fig. S1</b> .....                              | S9  |
| 9  | <b>Fig. S2</b> .....                              | S9  |
| 10 | <b>Fig. S3</b> .....                              | S10 |
| 11 | <b>Fig. S4</b> .....                              | S10 |
| 12 | <b>Fig. S5</b> .....                              | S11 |
| 13 | <b>Fig. S6</b> .....                              | S11 |
| 14 | <b>Fig. S7</b> .....                              | S12 |
| 15 | <b>Fig. S8</b> .....                              | S12 |
| 16 | <b>Fig. S9</b> .....                              | S13 |
| 17 | <b>Fig. S10</b> .....                             | S13 |
| 18 | <b>Fig. S11</b> .....                             | S13 |
| 19 | <b>Fig. S12</b> .....                             | S14 |
| 20 | <b>Fig. S13</b> .....                             | S14 |
| 21 | <b>Fig. S14</b> .....                             | S15 |
| 22 | <b>Fig. S15</b> .....                             | S15 |
| 23 | <b>Fig. S16</b> .....                             | S15 |
| 24 | <b>Fig. S17</b> .....                             | S16 |
| 25 | <b>Fig. S18</b> .....                             | S16 |
| 26 | <b>Table S1</b> .....                             | S18 |
| 27 | <b>Table S2</b> .....                             | S19 |
| 28 | <b>Table S3</b> .....                             | S19 |
| 29 | <b>Table S4</b> .....                             | S20 |
| 30 | <b>3. References</b> .....                        | S20 |

## 1 **Chemicals and materials**

2 Ferric chloride hexahydrate ( $\text{FeCl}_3 \cdot 6\text{H}_2\text{O}$ ), Sodium tungstate  
3 dihydrate ( $\text{Na}_2\text{WO}_4 \cdot 2\text{H}_2\text{O}$ ) potassium hydroxide (KOH), hydrofluoric acid (HF) and  
4 hydrochloric acid (HCl) were purchased from Aladdin Ltd (Shanghai, China).  
5 Commercial  $\text{IrO}_2$  and Pt/C was purchased from Sigma-Aldrich. Nafion solution (5  
6 wt%) provided by Dupont China Holding Co., Ltd (Tianjin, China). Ni Foam with a  
7 thickness of 1.6 mm and 120 ppi (pore per square inch) was purchased from Jia Shide  
8 Foam Metal Co., Ltd (Suzhou, China). Deionized water was used throughout the  
9 experiments.

## 10 **Material characterizations**

11 The morphology of nanoparticles was observed by SEM (Hitachi S4800). All  
12 samples for the TEM analysis prepared by depositing a drop of the diluted suspension  
13 in ethanol on carbon film-coated copper grid. The high-resolution transmission  
14 electron microscopy (HRTEM, JEM-2010FEF) was conducted on an FEI TECNAI  
15 F20 microscope at an acceleration voltage of 200 kV. The crystal phase of all  
16 synthesized materials was determined by powder XRD using a PANalytical Empyrean,  
17 Netherlands X-ray diffractometer with  $\text{Cu K}\alpha$  radiation source. X-Ray photoelectron  
18 spectroscopy (XPS) measurements were performed with a VG Scientific ESCALAB  
19 210 electron spectrometer using Mg KR radiation under a vacuum of  $2 \times 10^{-8}$  Pa at 14  
20 KV.

21

## 1 **Electrochemical measurements**

2 All electrochemical measurements were performed in a conventional  
3 three-electrode system at room temperature using a CHI 660E electrochemical  
4 analyzer (CHI Instruments, Shanghai, China). A platinum wire was used as counter  
5 electrode for OER and a graphite rod for HER. The reference electrode employed for  
6 all measurement was a saturated calomel electrode (SCE). The synthesized catalysts  
7 with a geometric area of  $1 \text{ cm}^2$  were directly served as the working electrodes. For  
8 powdery catalysts, the working electrodes were prepared by dropping catalyst ink  
9 onto nickel foam with a load of  $1 \text{ mg cm}^{-2}$ . The inks were obtained by sonicating the  
10 mixture containing catalysts, 5 mg of catalyst ( $\text{FeWO}_4/\text{Fe}_2\text{O}_3$ ,  $\text{Fe}_2\text{O}_3$ , Pt/C and  $\text{IrO}_2$ ),  
11 475  $\mu\text{L}$  of ethanol, 475  $\mu\text{L}$  of water and 50  $\mu\text{L}$  of 5 wt % Nafion for 30 min. The ink  
12 mix is applied to nickel foam in a load of  $1 \text{ mg cm}^{-2}$ . The 1 M KOH aqueous solution  
13 was used as the electrolytes, and all the polarization curves were recorded at a scan  
14 rate of  $5 \text{ mV s}^{-1}$  unless specifically indicated. In HER and OER characterizations, the  
15 polarization curves were iR-corrected using the equation:  $E_{iR\text{-corrected}} = E - iR$ , where E  
16 is the original potential, R is the solution resistance, i is the corresponding current,  
17 and  $E_{iR\text{-corrected}}$  is the iR-corrected potential. Polarization curves of all samples for HER  
18 and OER with 100% iR-compensation.

19 Electrochemical impedance spectroscopy (EIS) tests were carried out in a  
20 frequency ranging from 0.1 Hz to 100 kHz with AC amplitude of 10 mV. Furthermore,  
21 the HER and OER potentials were converted to RHE scale according to the equation:  
22  $E(\text{vs. RHE}) = E(\text{vs. SCE}) + 0.059 * \text{pH} + 0.241 \text{ V}$ , where the pH value of 13.969 for 1  
23 M KOH.

24

## 1 **ECSA calculation**

2 Electrochemical capacitance measurements were used to determine the active  
3 surface area of each catalyst. To estimate the electrochemical active surface area of  
4 the electrocatalysts, double-layer capacitance ( $C_{dl}$ ) was considered in the non-faradaic  
5 region (-0.654 ~ -0.714 V vs. RHE) of CVs recorded at different scan rates of 20, 40,  
6 60, 80, 120 and 140 mV s<sup>-1</sup>. Then, plotting the double-layer charging current at -0.684  
7 V vs. scan rate yields a linear slope, which is equivalent to twice the value of  $C_{dl}$ .  
8 Finally, the ECSA was obtained through dividing  $C_{dl}$  by the specific capacitance of  
9 electrode material. Generally, the specific capacitance for flat surface electrodes is  
10 0.06 mF cm<sup>-2</sup>.

## 11 **Turnover frequency calculations**

12 To calculate the per-site turnover frequency (TOF), we used the following formula  
13 according to previous reports<sup>1</sup>.

$$TOF \text{ per site} = \frac{\#Total \text{ Hydrogen Turn Overs}/cm^2 \text{ geometric area}}{\# \text{ Surface Sites}/cm^2 \text{ geometric area}}$$

14 The number of total hydrogen turn overs is calculated from the current density using  
15 the following equation:

$$\begin{aligned} 17 \quad \#H_2 &= \left( j \frac{mA}{cm^2} \right) \left( \frac{1Cs^{-1}}{1000mA} \right) \left( \frac{1 \text{ mol } e^{-1}}{96485.3C} \right) \left( \frac{1 \text{ mol } H_2}{2 \text{ mol } e^{-1}} \right) \left( \frac{6.022 \times 10^{23} \text{ } H_2 \text{ molecules}}{1 \text{ mol } H_2} \right) \\ &= 3.12 \times 10^{15} \frac{H_2/s}{cm^2} \text{ per } \frac{mA}{cm^2} \end{aligned}$$

18 The total number of effective surface sites was calculated based on the following  
19 equation:

$$\frac{\#Surfacesites}{cm^2 \text{ geometric area}} = \frac{\#Surfacesites(flat \text{ standard})}{cm^2 \text{ geometric area}} \times \text{Roughness factor}$$

1 Here the roughness factor (Rf) can be determined by the double-layer capacitance  
2 ( $C_{dl}$ ). The surface sites of  $2 \times 10^{15}$  for the flat standard electrode was used for our  
3 calculation according to previous results.<sup>1</sup> Thus, the number of surface active sites for  
4 the Ni<sub>2</sub>P@NC/NF catalyst is estimated to be:  $(3.95 \times 10^3/60) \times 2 \times 10^{15}$  surface  
5 sites/cm<sup>2</sup> =  $1.31 \times 10^{17}$  surface sites/cm<sup>2</sup>.

6 Therefore, in 1 M KOH solution, the TOF per site for the Ni<sub>2</sub>P@NC/NF catalyst at  
7  $\eta_{100}$  is calculated as follows:

$$(3.12 \times 10^{15} \frac{H_2/s}{cm^2} / \frac{mA}{cm^2}) (45.6 \frac{mA}{cm^2}) (\frac{1 cm^2}{6.63 \times 10^{17}}) = 1.09 H_2/s$$

### 8 **Theoretical calculation.**

9 The Density Functional Theory (DFT) calculations were carried out using the  
10 Castep module of Materials Studio. The electron exchange and correlation  
11 interactions were described by adopting the generalized gradient approximation  
12 (GGA) method with the Perdew-Burke-Ernzerhof (PBE) functional, and the  
13 interactions between core electrons and valence electrons were described by projector  
14 augmented-wave (PAW) method. The Monkhorst-Pack grid k-points of  $3 \times 3 \times 1$  were  
15 adopted to integrate the Brillouin zone, and the kinetic cut-off energy was set at 400  
16 eV. The convergence thresholds for energy and force were set at  $1.0 \times 10^{-5}$  eV/atom and  
17  $0.02$  eV Å<sup>-1</sup>, respectively. The self-consistence field (SCF) tolerance was set to  
18  $1.0 \times 10^{-5}$  eV/atom. To calculate the hydrogen adsorption energy, we constructed the  
19 theoretical models of FeWO<sub>4</sub>, Fe<sub>2</sub>O<sub>3</sub> and FeWO<sub>4</sub>/Fe<sub>2</sub>O<sub>3</sub> heterostructure with the  
20 vacuum space of 15 Å. The calculations for both FeWO<sub>4</sub> and Fe<sub>2</sub>O<sub>3</sub> were conducted  
21 on (100) and (001) crystal plane according to the literatures, respectively.<sup>2</sup> Then, the  
22 heterostructure model was constructed by adjusting the arrangement of the two

1 surfaces. The Gibbs free energies of hydrogen adsorption ( $\Delta G_{H^*}$ ) were calculated as  
2 follow:

$$3 \quad \Delta G_{H^*} = \Delta E_{H^*} + \Delta E_{ZPE} - T\Delta S$$

4 Where  $\Delta E_{H^*} = E_{(slab+H^*)} - E_{(slab)} - E_{H_2}/2$ ,  $\Delta E_{ZPE}$  stands for the change in zero-point  
5 energy and  $\Delta S$  represents the entropy change.<sup>3</sup> Norskov et al. previously reported that  
6  $\Delta E_{ZPE} - T\Delta S$  is approximately 0.24 eV.<sup>4</sup> Therefore, we take  $\Delta G_{H^*} = \Delta E_{H^*} + 0.24$  eV.

7 The four sequential electron transfer steps, including adsorption steps (i and iii),  
8 dissociation steps (ii and iv) and desorption step (v). Considering that the overall  
9 water decomposition process requires energy 4.92 eV at the standard conditions, the  
10 energy for at least one step in (i–iv) should be larger or equal to 1.23 eV. For the OER  
11 in alkaline environment, the whole process occurs via the following four elementary  
12 steps:

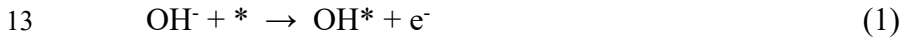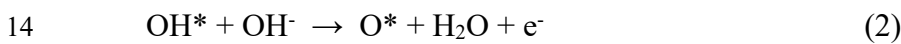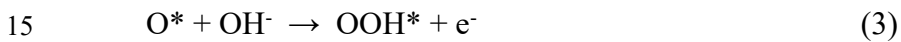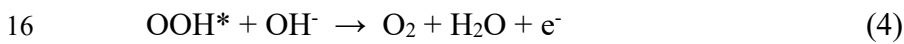

17 The adsorption free energies ( $\Delta G$ ) of OER intermediates can be obtained by  $\Delta G_i$   
18 =  $\Delta E_i + \Delta ZPE_i - T\Delta S_i$ , where  $i$  means  $OH^*$ ,  $O^*$  and  $OOH^*$ . Li et al. previously  
19 reported that  $\Delta ZPE - T S$  are 0.06, 0.37 and 0.44 eV for  $O^*$ ,  $OH^*$  and  $OOH^*$ ,  
20 respectively.<sup>5</sup> Furthermore, the  $\Delta E$  for OER intermediates was calculated as follow:

1 
$$\Delta E_{OH} = E(OH^*) - E(^*) - [E(H_2O) - 1/2E(H_2)]$$

2 
$$\Delta E_O = E(O^*) - E(^*) - [E(H_2O) - E(H_2)]$$

3 
$$\Delta E_{OOH} = E(OOH^*) - E(^*) - [2E(H_2O) - 3/2E(H_2)]$$

4 Therefore, the Gibbs free energy changes for the four elementary steps of OER can be  
5 expressed as follows:

6 
$$\Delta G_1 = \Delta G_{OH} - eU$$

7 
$$\Delta G_2 = \Delta G_O - \Delta G_{OH} - eU$$

8 
$$\Delta G_3 = \Delta G_{OOH} - \Delta G_O - eU$$

9 
$$\Delta G_4 = 4.92 \text{ eV} - \Delta G_{OOH} - eU$$

10 Where U is the potential measured against the normal hydrogen electrode (NHE) at  
11 standard conditions. Therefore, the theoretical overpotential ( $\eta$ ) for OER can be  
12 obtained by the following equation:

13 
$$\eta_{OER} = \max[\Delta G_1, \Delta G_2, \Delta G_3, \Delta G_4]/e - 1.23 \text{ [V]}$$

14

15

16

17

18

19

20

21

22

23



1 **Figure**

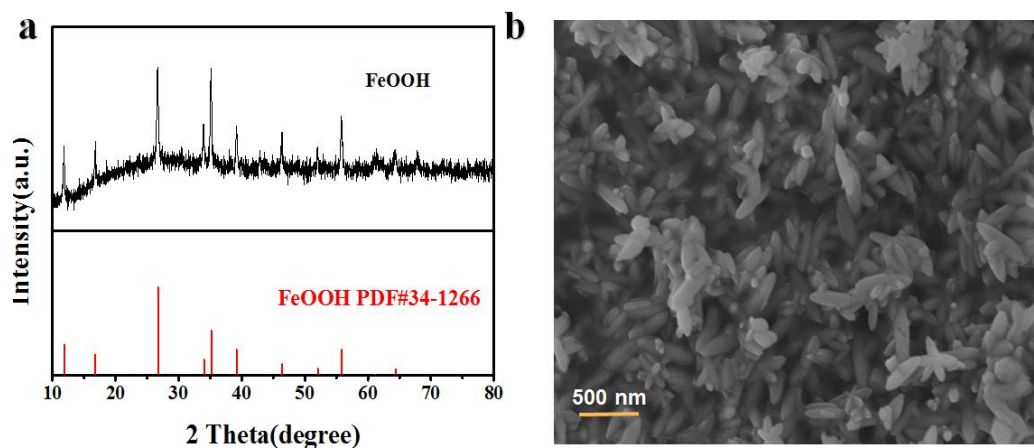

2 Fig. S1. (a) XRD pattern and (b) SEM image of FeOOH hybrid.

3

4

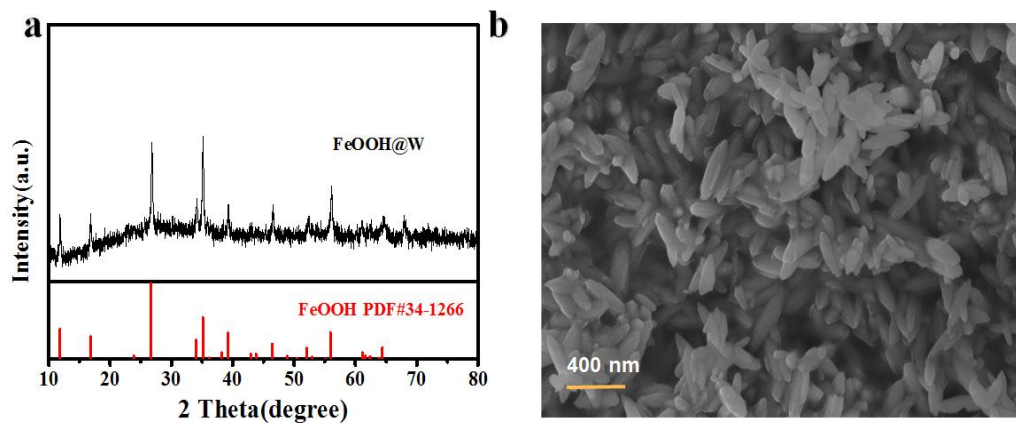

5

6 Fig. S2. (a) XRD pattern and (b) SEM image of FeOOH@W complex hybrid.

7

8

9

10

11

12

13

14

15

16

17

18

19

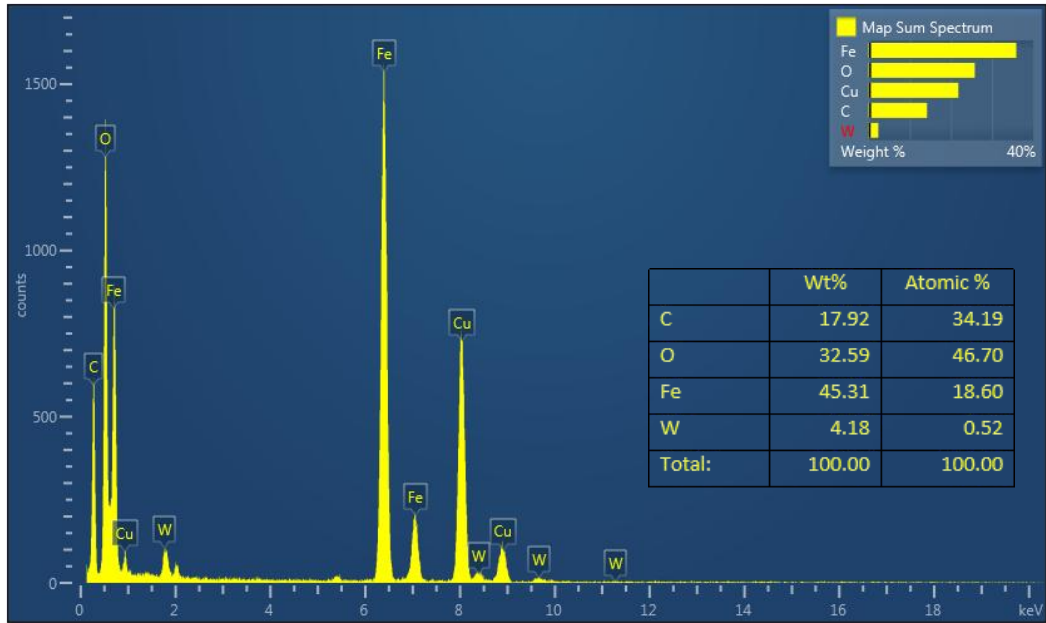

1  
2

Fig. S3. EDS spectrum of the FeWO<sub>4</sub>/Fe<sub>2</sub>O<sub>3</sub>.

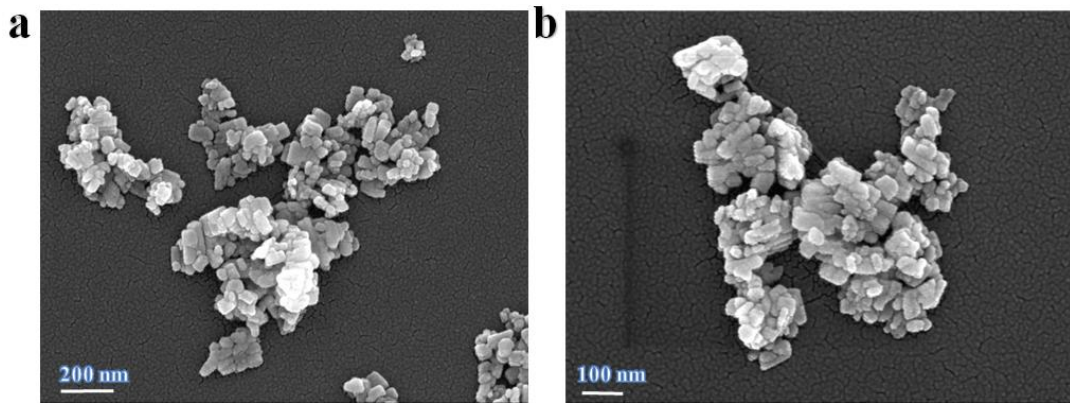

3  
4  
5  
6  
7  
8  
9  
10  
11  
12  
13  
14

Fig. S4. SEM image of Fe<sub>2</sub>O<sub>3</sub> at different magnifications.

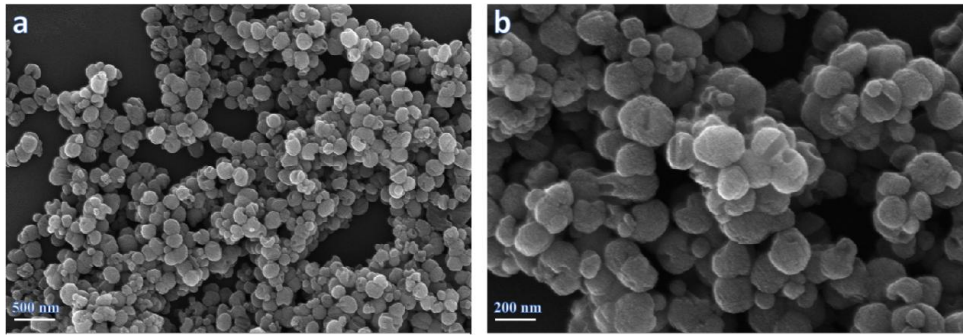

1  
2  
3

Fig. S5. SEM image of Fe<sub>2</sub>O<sub>3</sub> at different magnifications.

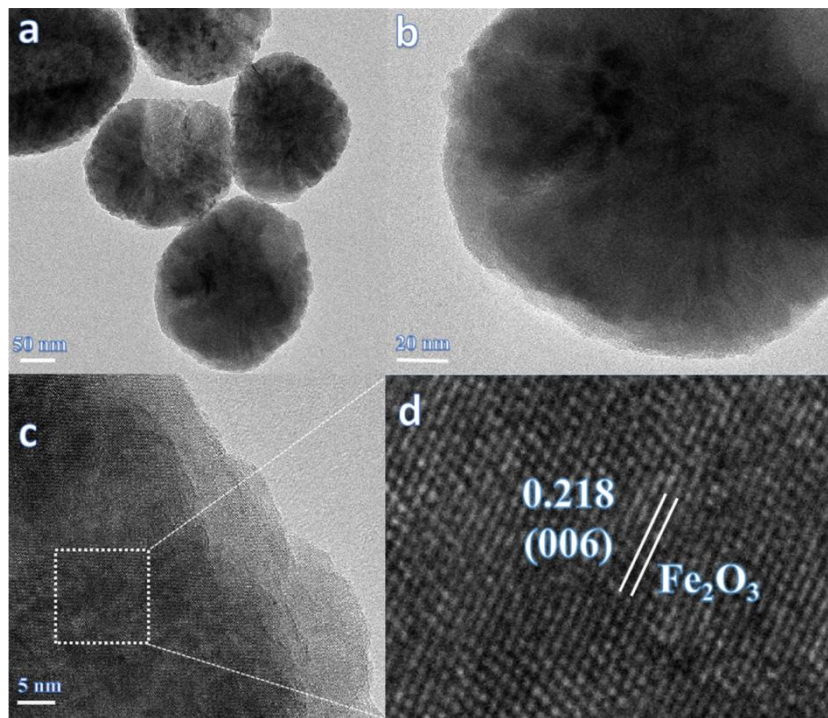

4  
5  
6  
7  
8  
9  
10  
11  
12  
13  
14  
15  
16  
17  
18

Fig. S6. (a-b) HRTEM image image of Fe<sub>2</sub>O<sub>3</sub>. (d) Enlarged portion of the white box in the Fig. c.

1

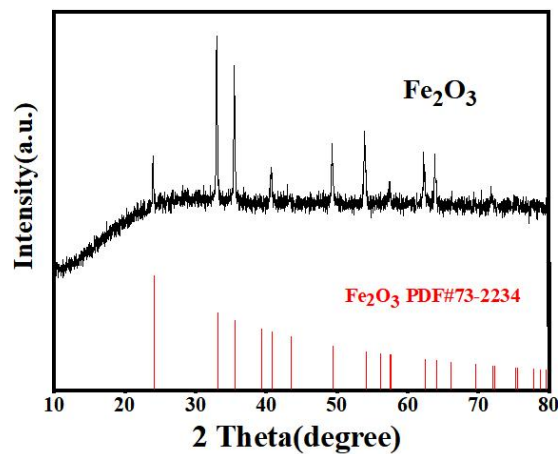

2

Fig. S7. XRD pattern of Fe<sub>2</sub>O<sub>3</sub>.

3

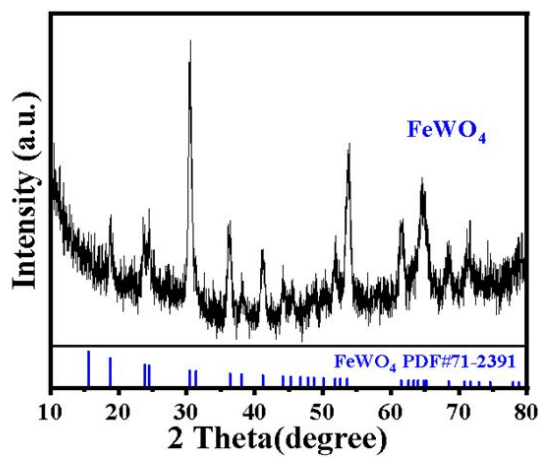

4

Fig. S8. (a) XRD pattern of FeWO<sub>4</sub>.

5

6

7

8

9

10

11

12

13

14

15

16

17

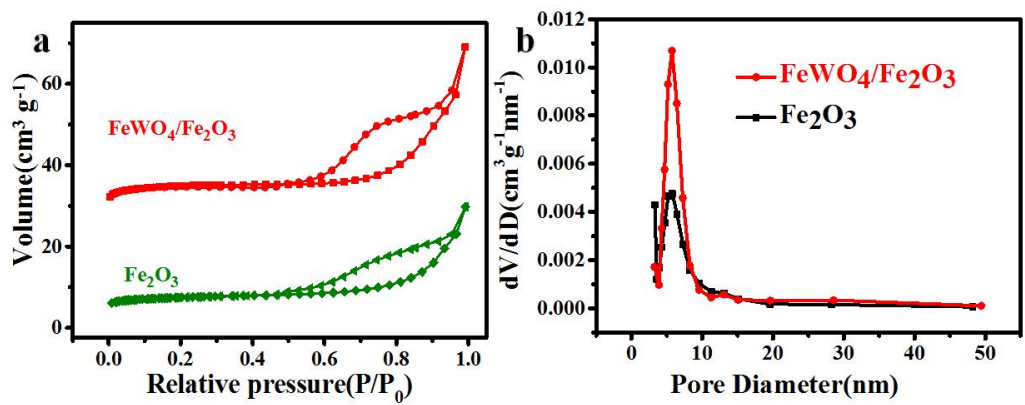

1 Fig. S9. (a) Nitrogen adsorption-desorption isotherms (b) the pore size distribution  
 2 curves of the FeWO<sub>4</sub>/Fe<sub>2</sub>O<sub>3</sub> and Fe<sub>2</sub>O<sub>3</sub>.  
 3  
 4

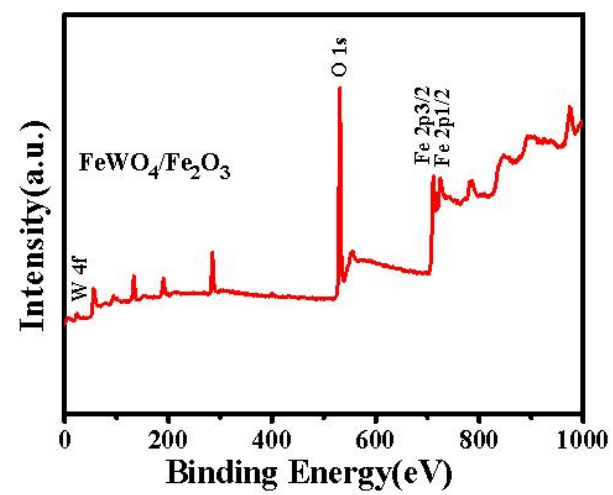

5 Fig. S10. XPS spectra of FeWO<sub>4</sub>/Fe<sub>2</sub>O<sub>3</sub>.  
 6  
 7  
 8  
 9

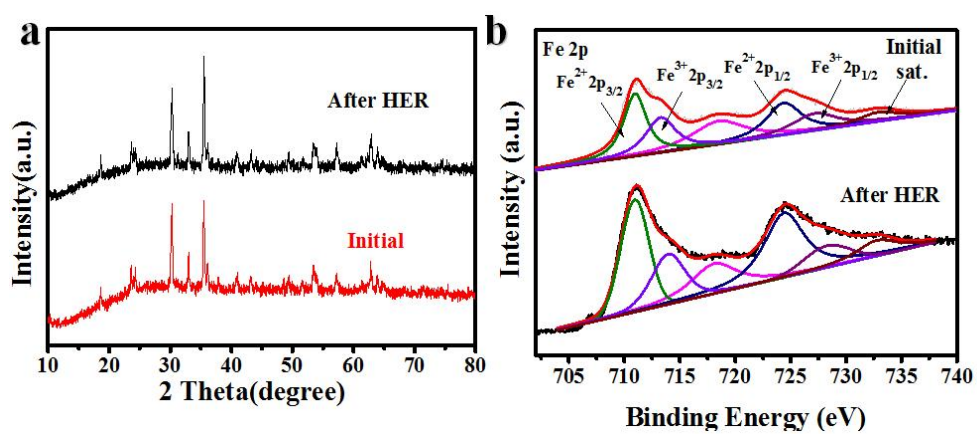

10 Fig. S11. (a) XRD pattern and (b) XPS spectra of FeWO<sub>4</sub>/Fe<sub>2</sub>O<sub>3</sub> of Fe 2p after HER  
 11 durability test.  
 12



1

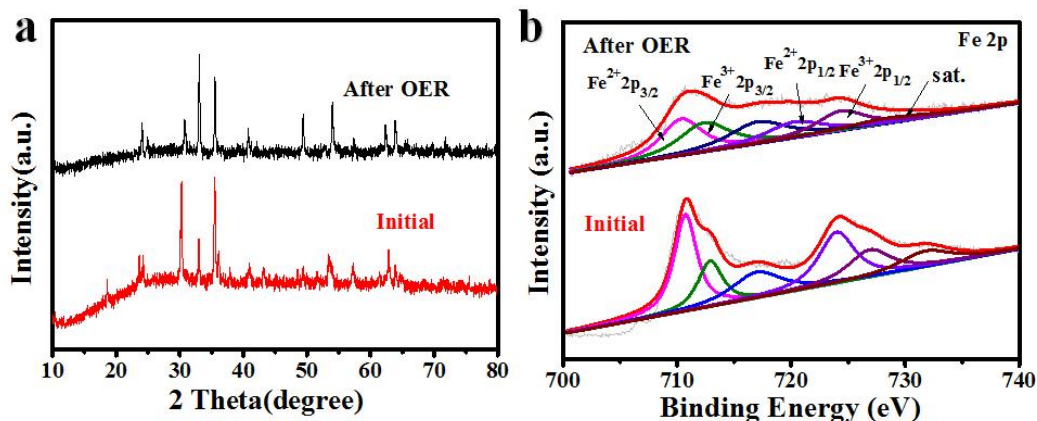

2 Fig. S12. (a) XRD pattern and (b) XPS spectra of FeWO<sub>4</sub>/Fe<sub>2</sub>O<sub>3</sub> of Fe 2p after long  
 3 time OER durability test.

4

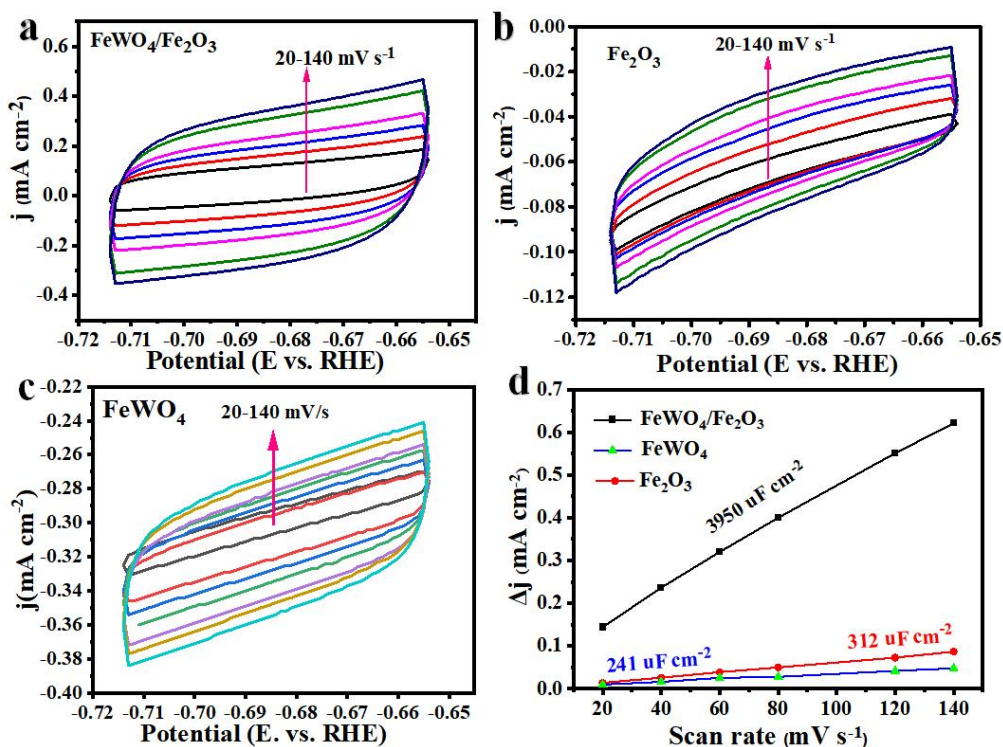

5 Fig. S13. Cyclic voltammogram (CV) curves at different scan rates for (a)  
 6 FeWO<sub>4</sub>/Fe<sub>2</sub>O<sub>3</sub>, (b) Fe<sub>2</sub>O<sub>3</sub>, (c) FeWO<sub>4</sub>, (d) The current density variation at 0.389 V  
 7 versus RHE plotted against the scan rates.

8

9

10

11

12

13

14

15

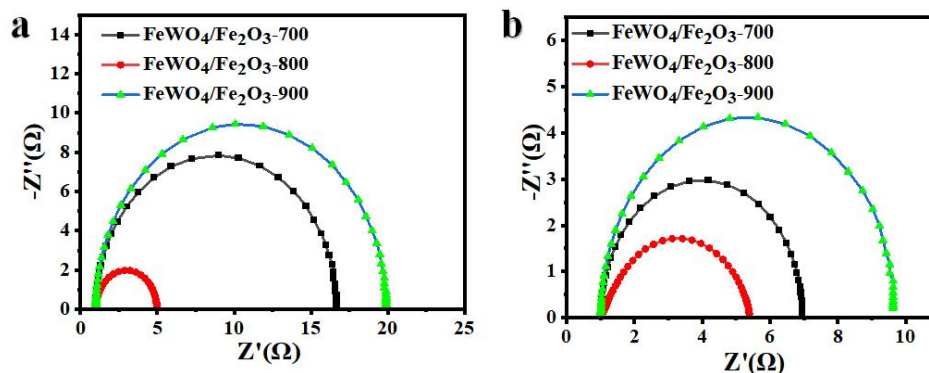

1 Fig. S14. Nyquist plots of FeWO<sub>4</sub>/Fe<sub>2</sub>O<sub>3</sub>-700 and FeWO<sub>4</sub>/Fe<sub>2</sub>O<sub>3</sub>-900 measured for  
 2 HER at overpotential of 150 mV (A) and (B) for OER at overpotential of 350 mV.  
 3

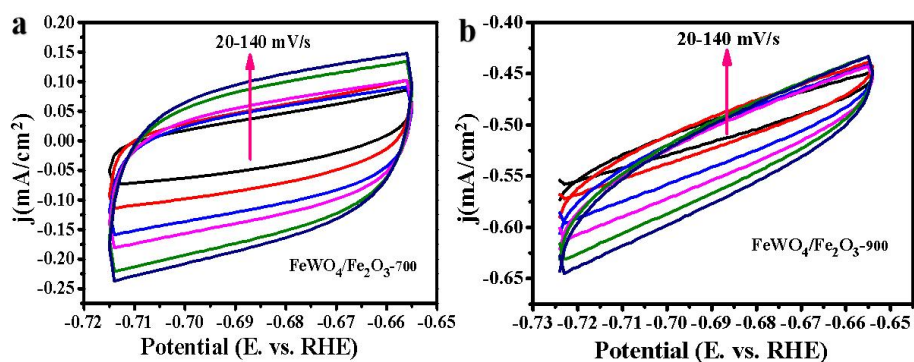

4  
 5 Fig. S15. Cyclic voltammogram (CV) curves at different scan rates for (A)  
 6 FeWO<sub>4</sub>/Fe<sub>2</sub>O<sub>3</sub>-700 and (B) FeWO<sub>4</sub>/Fe<sub>2</sub>O<sub>3</sub>-900.  
 7  
 8  
 9

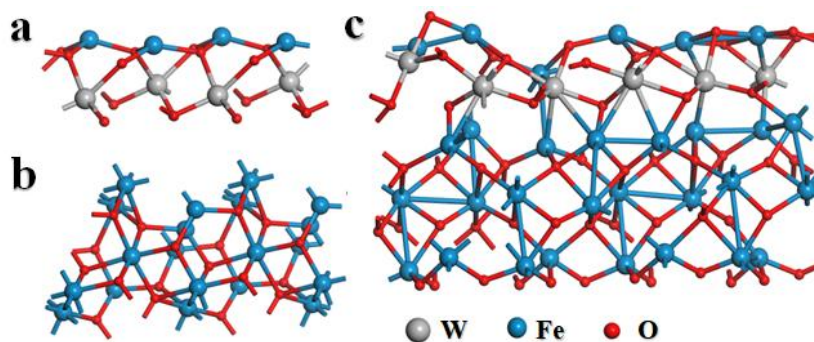

10  
 11 Fig. S16. Theoretical structure models of FeWO<sub>4</sub> (100) surface, Fe<sub>2</sub>O<sub>3</sub> (001) surface  
 12 and FeWO<sub>4</sub>/Fe<sub>2</sub>O<sub>3</sub> interface.  
 13  
 14  
 15  
 16

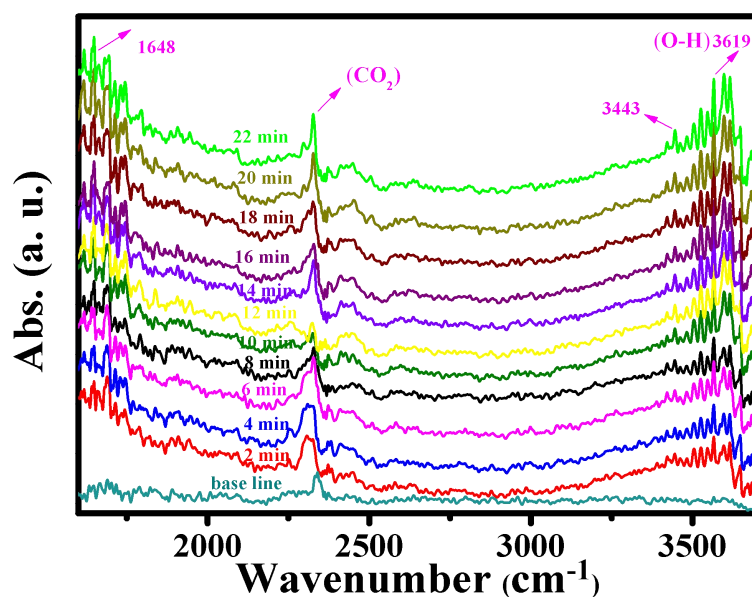

1 Fig. S17. *In situ* FTIR of FeWO<sub>4</sub>/Fe<sub>2</sub>O<sub>3</sub> at a overpotential of 350 mV in 1 M KOH.  
2

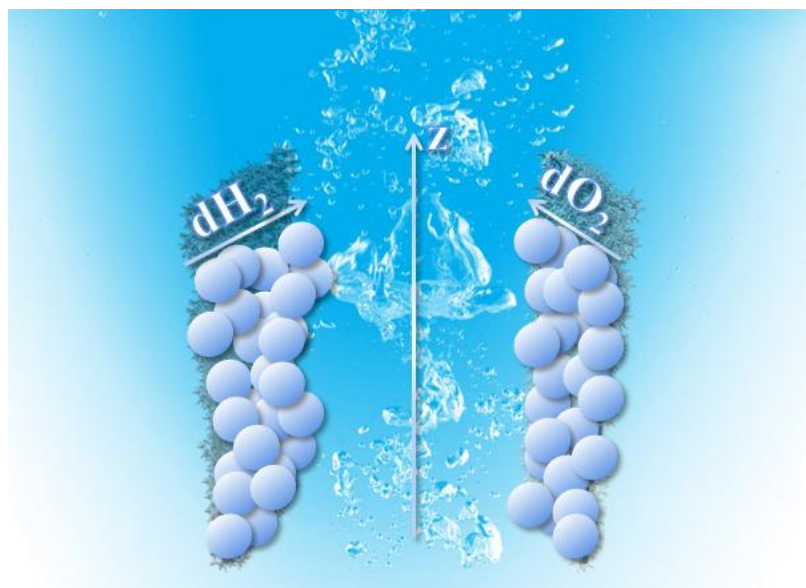

3  
4 Fig. S18. Schematic representation of the separation of hydrogen and oxygen bubbles  
5 from the surface during water splitting  
6

7 During the water electrolysis, hydrogen and oxygen gases are formed on the  
8 surface of the electrodes, and they can only be separated from the surface upon  
9 reaching sufficient size. The coverage of the electrode surface by the formed bubbles  
10 can increase the total resistance of the system, resulting in a reduction of the interface  
11 between the electrode and the electrolyte. Therefore, the accumulation of bubbles  
12 increases the amount of the overpotential required for electrolysis of water.



1 Before discussing the development of bubble separation strategies from the  
 2 electrode surface, a careful study of the bubble behavior separation from the electrode  
 3 surface during the water electrolysis reaction is required. In general, a bubble can be  
 4 removed from the surface and penetrate the electrolyte when its diameter reaches a  
 5 critical value [45,46]. Schematic represents the separation of hydrogen and oxygen  
 6 bubbles is shown in Fig. above. The motion direction of the bubbles is along the x and  
 7 z-axes. The motion in the x-direction is due to the difference in the concentration of  
 8 gas bubbles in the electrolyte, whereas movement in the z-direction is due to the  
 9 density difference between the gas bubble and the electrolyte. Therefore, the resultant  
 10 force in the x and z-direction determines the direction of motion of the gas bubbles. If  
 11 the bubble separation rate is low on the surface of the electrode, a layer of bubbles is  
 12 formed on the surface, and its thickness will be a function of its height. As the  
 13 schematic Fig. indicates, with increasing height, the thickness of this layer is also  
 14 increased. The low separation rate of the bubbles will increase the effect of the bubble,  
 15 which will increase the IR drop, consequently increasing the overpotential.

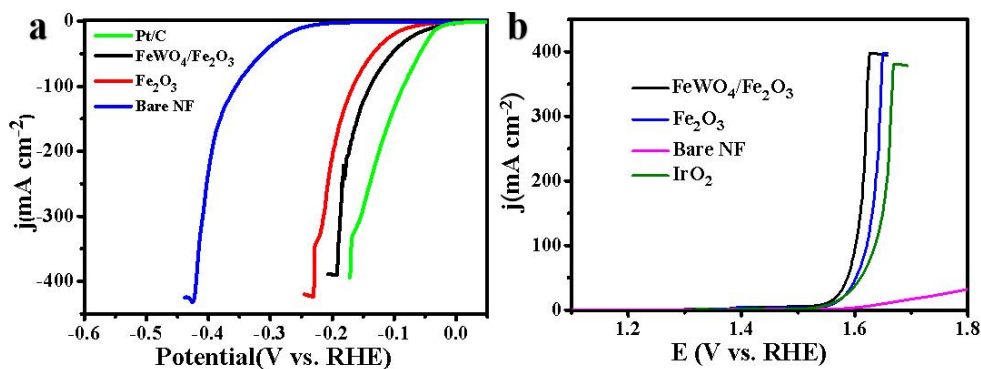

16 Fig. S19. The saturated performances of homometallic heterojunction FeWO<sub>4</sub>/Fe<sub>2</sub>O<sub>3</sub>  
 17 and other control catalysts under high current densities in the electrocatalytic HER  
 18 and OER, respectively.

19 when increasing the over-potentials, the working current densities of  
 20 heterojunction FeWO<sub>4</sub>/Fe<sub>2</sub>O<sub>3</sub> reached the saturated platform statues at around 400 mA  
 21 cm<sup>-2</sup> for HER and OER, respectively. Importantly, the similar saturated current  
 22 densities were also observed in the cases of using control catalysts such as Fe<sub>2</sub>O<sub>3</sub>, bare  
 23 NF, and IrO<sub>2</sub> when increasing the over-potentials. Those comprehensive results  
 24 further implied that the saturation current densities were not only determined by the

1 nature of electrode materials, but also hugely affected by the kinetics of specific  
 2 reaction conditions and experimental set ups.

3  
 4

5 Table S1 HER comparison in 1.0 M KOH with the recently reported literatures

| Materials                                            | Tafel slope (mV<br>dec <sup>-1</sup> ) | $\eta_{10}$ / mV  | Reference        |
|------------------------------------------------------|----------------------------------------|-------------------|------------------|
| <b>FeWO<sub>4</sub>/Fe<sub>2</sub>O<sub>3</sub></b>  | <b>63.3</b>                            | <b>38</b>         | <b>This work</b> |
| Ni <sub>3</sub> N-V <sub>2</sub> O <sub>3</sub> -3-1 | 50                                     | 57                | [6]              |
| Co/MoN                                               | 77.5                                   | 52                | [7]              |
| 1T-MoS <sub>2</sub> QS/Ni(OH) <sub>2</sub>           | 30                                     | 57                | [8]              |
| NiMoN/Ni <sub>3</sub> N-6                            | 76                                     | 46                | [9]              |
| (Ni, Fe)S <sub>2</sub> @MoS <sub>2</sub>             | 101.22                                 | 130               | [10]             |
| Ni(OH) <sub>2</sub> /Ni <sub>3</sub> S <sub>2</sub>  | 49                                     | 50                | [11]             |
| W <sub>2</sub> N/WC                                  | 58.7                                   | 148.5             | [12]             |
| Fe <sub>3</sub> O <sub>4</sub> -FeS/IF               | 126.3                                  | $\eta_{20}$ 120.8 | [13]             |
| MoP/MoO <sub>2</sub>                                 | 41                                     | 79                | [14]             |
| CoP/Co <sub>2</sub> P                                | 51.8                                   | 68                | [15]             |
| P-MoS <sub>2</sub> @CoP/CC                           | 51.2                                   | 64                | [16]             |
| FeNi <sub>3</sub> -MoO <sub>2</sub> /NF              | 60.1                                   | 50.8              | [17]             |
| 1T-MoS <sub>2</sub> /CoS <sub>2</sub>                | 60                                     | 71                | [18]             |
| Ni <sub>3</sub> S <sub>2</sub> @NiV-LDH/NF           | 90                                     | 126               | [19]             |

6  
 7

1 Table S2 OER comparison in 1.0 M KOH with the recently reported literatures

| Materials                                           | Tafel slope<br>(mV dec <sup>-1</sup> ) | j(mA/m <sup>2</sup> ) | OER(mV)    | Reference        |
|-----------------------------------------------------|----------------------------------------|-----------------------|------------|------------------|
| <b>FeWO<sub>4</sub>/Fe<sub>2</sub>O<sub>3</sub></b> | <b>57</b>                              | <b>10</b>             | <b>315</b> | <b>This work</b> |
| Fe-CoO/C                                            | 60                                     | 10                    | 362        | [20]             |
| Co <sub>9</sub> S <sub>8</sub> @MoS <sub>2</sub>    | 94                                     | 10                    | 340        | [21]             |
| W <sub>2</sub> N/WC                                 | 122.8                                  | 10                    | 320        | [12]             |
| NiCo <sub>2</sub> O <sub>4</sub> /NCNTs/NiCo        | 89                                     | 10                    | 350        | [22]             |
| NiO/NiCo <sub>2</sub> O <sub>4</sub>                | 67                                     | 10                    | 450        | [23]             |
| NiSe <sub>2</sub> /CoSe <sub>2</sub> -T             | 65                                     | 10                    | 337        | [24]             |
| CoO/Co <sub>x</sub> P                               | 101                                    | 10                    | 370        | [25]             |
| Ni <sub>3</sub> Se <sub>4</sub> /UCL-3              | 89.4                                   | 10                    | 350        | [26]             |
| CoO-MoO <sub>2</sub>                                | 69                                     | 10                    | 312        | [27]             |
| Fe <sub>2</sub> O <sub>3</sub> -MnO/NF              | 66                                     | 10                    | 370        | [28]             |
| CoFe-Co@PNC                                         | 81                                     | 10                    | 320        | [29]             |
| NH <sub>2</sub> -MIL-88B(Fe)                        | 60                                     | 10                    | 410        | [30]             |
| NiCoP/C                                             | 96                                     | 10                    | 330        | [31]             |
| CoC <sub>x</sub> /FeCo@C/rGO                        | 73.9                                   | 10                    | 390        | [32]             |

2

3

4 Table S3. at  $\eta = 100$  mV, TOF of FeWO<sub>4</sub>/Fe<sub>2</sub>O<sub>3</sub>, Fe<sub>2</sub>O<sub>3</sub> and FeWO<sub>4</sub> in 1 M KOH  
5 solution.

| Colum                                               | TOF | HER                  | OER                  |
|-----------------------------------------------------|-----|----------------------|----------------------|
| <b>FeWO<sub>4</sub>/Fe<sub>2</sub>O<sub>3</sub></b> |     | 1.09 s <sup>-1</sup> | 0.2 s <sup>-1</sup>  |
| <b>Fe<sub>2</sub>O<sub>3</sub></b>                  |     | 0.56 s <sup>-1</sup> | 0.05 s <sup>-1</sup> |
| <b>FeWO<sub>4</sub></b>                             |     | 0.27 s <sup>-1</sup> | 0.03 s <sup>-1</sup> |

6

1

Table S4 Summary of overall water-splitting electrocatalysts

| Materials                                           | Overpotential (mV@10 mA/cm <sup>2</sup> ) | Reference        |
|-----------------------------------------------------|-------------------------------------------|------------------|
| <b>FeWO<sub>4</sub>/Fe<sub>2</sub>O<sub>3</sub></b> | <b>1.62</b>                               | <b>This work</b> |
| mCo <sub>0.5</sub> Fe <sub>0.5</sub> P/rGO          | 1.66                                      | [33]             |
| MoS <sub>2</sub> -NiS <sub>2</sub> /NGF             | 1.64                                      | [34]             |
| NiS/Ni <sub>2</sub> P/CC                            | 1.62                                      | [35]             |
| Ni(OH) <sub>2</sub> /Ni <sub>3</sub> S <sub>2</sub> | 1.64                                      | [11]             |
| CoCO <sub>3</sub> @NiFe LDH                         | 1.67                                      | [36]             |
| Fe <sub>3</sub> O <sub>4</sub> -CoPx/TiN            | 1.75                                      | [37]             |
| CoFe@CNWs                                           | 1.64                                      | [38]             |
| Co-Co <sub>2</sub> C/CC                             | 1.63                                      | [39]             |
| Co <sub>2</sub> P/CoN-in-NCNT                       | 1.64                                      | [40]             |
| Co <sub>0.8</sub> Fe <sub>0.2</sub> P/NF            | 1.67                                      | [41]             |
| CoFeZr oxides/NF                                    | 1.63                                      | [42]             |
| CoP@FeCoP/NC                                        | 1.68                                      | [43]             |
| MoNi/NiMoO <sub>x</sub> @NiFe                       | 1.64                                      | [44]             |

2

3

4 **Reference**

- 5 1. H. Zhang, W.Q. Li, X. Feng, L. Zhu, Q.Z. Fang, S. Li, L.Y. Wang, Z.J. Li and Z.K.  
6 Kou, A chainmail effect of ultrathin N-doped carbon shell on Ni<sub>2</sub>P nanorod arrays for  
7 efficient hydrogen evolution reaction catalysis, *J. Colloid. Interf. Sci.*, 2022, **607**,  
8 281-289.
- 9 2. L.Y. Zeng, K.A. Sun, X.B. Wang, Y.Q. Liu, Y. Pan, Z. Liu, D.W. Cao, Y. Song, S.H.  
10 Liu and C.G. Liu, Three-dimensional-networked Ni<sub>2</sub>P/Ni<sub>3</sub>S<sub>2</sub> heteronanoflake arrays  
11 for highly enhanced electrochemical overall-water-splitting activity, *Nano Energy*,  
12 2018, **51**, 26-36.
- 13 3. L.H. Ou, F. Yang, Y. Liu and S.L. Chen, First-principle study of the adsorption and  
14 dissociation of O<sub>2</sub> on Pt (111) in acidic media, *J. Phys. Chem. C*, 2009, **113**,  
15 20657-20665.
- 16 4. J.K. Nørskov, A. Logadottir, J. Kitchin, J.G. Chen, S. Pandalov and U. Stimming,

- 1 Trends in the exchange current for hydrogen evolution, *J Electrochem Soc.*, 2005, **152**,  
2 J23.
- 3 5. X.R. Gao, X.M Liu, W.J. Zang, H.L. Dong, Y.J. Pang, Z.K. Kou, P.Y. Wang, Z.H.  
4 Pan, S.R. Wei, S.C. Mu and J. Wang, Synergizing in-grown Ni<sub>3</sub>N/Ni heterostructured  
5 core and ultrathin Ni<sub>3</sub>N surface shell enables self-adaptive surface reconfiguration and  
6 efficient oxygen evolution reaction, *Nano Energy*, 2020, **78**, 105355.
- 7 6. P. Zhou, G.Y. Zhai, X.S. Lv, Y.Y. Liu, Z.Y. Wang, P. Wang, Z.K. Zheng, H.F.  
8 Cheng, Y. Dai and B.B. Huang, Boosting the electrocatalytic HER performance of  
9 Ni<sub>3</sub>N-V<sub>2</sub>O<sub>3</sub> via the interface coupling effect, *Appl. Catal. B*, 2021, **283**, 119590.
- 10 7. J.W. Sun, W.J. Xu, C.X. Lv, L.J. Zhang, M. Shakouri, Y.H. Peng, Q.Q. Wang, X.F.  
11 Yang, D. Yuan, M.H. Huang, Y.F. Hu, D.J. Yang and L.X. Zhang, Co/MoN  
12 hetero-interface nanoflake array with enhanced water dissociation capability achieves  
13 the Pt-like hydrogen evolution catalytic performance, *Appl. Catal. B*, 2021, **286**,  
14 119882.
- 15 8. W.S. Chen, J.J. Gu, Y.P. Du, F. Song, F.X. Bu, J.H. Li, Y. Yuan, R.C. Luo, Q.L.  
16 Liu and D. Zhang, Achieving rich and active alkaline hydrogen evolution  
17 heterostructures via interface engineering on 2D 1T-MoS<sub>2</sub> quantum sheets, *Adv. Funct.*  
18 *Mater.* 2020, **30**, 2000551.
- 19 9. W. Hua, H.H. Sun, H.Y. Liu, Y.Y. Li, J.-G. Wang, Interface engineered  
20 NiMoN/Ni<sub>3</sub>N heterostructures for enhanced alkaline hydrogen evolution reaction,  
21 *Appl. Surf. Sci.*, 2021, **540**, 148407.
- 22 10. Y.K. Liu, S. Jiang, S.J. Li, L. Zhou, Z.H. Li, J.M. Li and M.F. Shao, Interface  
23 engineering of (Ni, Fe)S<sub>2</sub>@MoS<sub>2</sub> heterostructures for synergetic electrochemical  
24 water splitting, *Appl. Catal. B*, 2019, **247**, 107-114.
- 25 11. Q.H. Xu, H. Jiang, H.X. Zhang, Y.J. Hu, C.Z. Li, Heterogeneous interface  
26 engineered atomic configuration on ultrathin Ni(OH)<sub>2</sub>/Ni<sub>3</sub>S<sub>2</sub> nanoforests for efficient  
27 water splitting, *Appl. Catal. B*, 2019, **242**, 60-66.
- 28 12. J.X. Diao, Y. Qiu, S.Q. Liu, W.T. Wang, K. Chen, H.L. Li, W.Y. Yuan, Y.T. Qu,  
29 X.H. Guo, Interfacial engineering of W<sub>2</sub>N/WC heterostructures derived from  
30 solid-state synthesis: a highly efficient trifunctional electrocatalyst for ORR, OER,  
31 and HER, *Adv. Mater.*, 2020, **32**, 1905679.
- 32 13. M. Yang, W.-H. Hu, M.-X. Li, Y.-N. Cao, B. Dong, Y. Ma, H.-Y. Zhao, F.-G.  
33 Wang, J. Huang and Y.-M. Chai, Controlled high-density interface engineering of  
34 Fe<sub>3</sub>O<sub>4</sub>-FeS nanoarray for efficient hydrogen evolution, *J. Energy. Chem.*, 2022, **68**,  
35 96-103.
- 36 14. M.M. Ding, H. Xu, M.X. Liu, Y.T. Wang, A.Q. Wang, T. Lin, L. Zhang and K.  
37 Zhang, Interface construction and porosity engineering to trigger efficient hydrogen  
38 evolution of two-dimensional porous molybdenum phosphide/dioxide heterojunction  
39 nanosheets in acidic and alkaline electrolytes, *Chem. Eng. J.*, 2020, **430**, 132674.
- 40 15. Y.P. Hua, Q.C. Xu, Y.J. Hu, H. Jiang and C.Z. Li, Interface-strengthened CoP  
41 nanosheet array with Co<sub>2</sub>P nanoparticles as efficient electrocatalysts for overall water  
42 splitting, *J. Energy. Chem.*, 2019, **37**, 1-6.
- 43 16. Y. Hu, H.B. Yu, L.L. Qi, J.X. Dong, P.X. Yan, T.T. Isimjan and X.L. Yang,  
44 Interface engineering of needle-like P-doped MoS<sub>2</sub>/CoP arrays as highly active and

- 1 durable bifunctional electrocatalyst for overall water splitting, *ChemSusChem*, 2021,  
2 **14**, 1565-1573.
- 3 17. Q.L. Xu, T.Q. Yu, J.L. Chen, G.F. Qian, H.N. Song, L. Luo, Y.L. Chen, T.Y. Liu,  
4 Y.Z. Wang and S.B. Yin, Coupling interface constructions of FeNi<sub>3</sub>-MoO<sub>2</sub>  
5 heterostructures for efficient urea oxidation and hydrogen evolution reaction, *ACS*  
6 *Appl. Mater. Inter.*, 2021, **13**, 16355-16363.
- 7 18. Y.Y. Feng, T. Zhang, J.H. Zhang, H. Fan, C. He and J.X. Song, 3D 1T-MoS<sub>2</sub>/CoS<sub>2</sub>  
8 heterostructure via interface engineering for ultrafast hydrogen evolution reaction,  
9 *Small*, 2020, **16**, 2002850.
- 10 19. Q.Q. Liu, J.F. Huang, Y.J. Zhao, L.Y. Cao, K. Li, N. Zhang, D. Yang, L. Feng and  
11 L.L. Feng, Tuning the coupling interface of ultrathin Ni<sub>3</sub>S<sub>2</sub>@ NiV-LDH  
12 heterogeneous nanosheet electrocatalysts for improved overall water splitting,  
13 *Nanoscale*, 2019, **11**, 8855-8863.
- 14 20. W.M. Li, M.X. Li, C. Wang, Y. Wei and X.F. Lu, Fe doped CoO/C nanofibers  
15 towards efficient oxygen evolution reaction, *Appl. Surf. Sci.*, 2020, **506**, 144680.
- 16 21. J.M. Bai, T. Meng, D.L. Guo, S.G. Wang, B.G. Mao, M.H. Cao, Co<sub>9</sub>S<sub>8</sub>@MoS<sub>2</sub>  
17 core-shell heterostructures as trifunctional electrocatalysts for overall water splitting  
18 and Zn-air batteries, *ACS Appl. Mater. Inter.*, 2018, **10**, 1678-1689.
- 19 22. C. Chen, H. Su, L.-N. Lu, Y.-S. Hong, Y. Chen, K. Xiao, T. Ouyang, Y.L. Qin,  
20 Z.-Q. Liu, Interfacing spinel NiCo<sub>2</sub>O<sub>4</sub> and NiCo alloy derived N-doped carbon  
21 nanotubes for enhanced oxygen electrocatalysis, *Chem. Eng. J.*, 2021, **408**, 127814.
- 22 23. R. Mondal, H.S. Ratnawat, S. Kumar, A. Kumar, P. Singh, Ni stabilized rock-salt  
23 structured CoO; Co<sub>1-x</sub>Ni<sub>x</sub>O: tuning of electrons to develop a novel OER catalyst, *RSC*  
24 *Adv.*, 2020, **10**, 17845-17853.
- 25 24. X.R. Zheng, X.P. Han, Y.H. Cao, Y. Zhang, D. Nordlund, J.H. Wang, S.L. Chou, H.  
26 Liu, L.L. Li, C. Zhong, Y.D. Deng and W.B. Hu, Identifying dense NiSe<sub>2</sub>/CoSe<sub>2</sub>  
27 heterointerfaces coupled with surface high-valence bimetallic sites for synergistically  
28 enhanced oxygen electrocatalysis, *Adv. Mater.*, 2020, **32**, 2000607.
- 29 25. Y. Niu, M.L. Xiao, J.B. Zhu, T.T. Zeng, J.D. Li, W.Y. Zhang, D. Su, A.P. Yu, Z.W.  
30 Chen, A "trimurti" heterostructured hybrid with an intimate CoO/Co<sub>x</sub>P interface as a  
31 robust bifunctional air electrode for rechargeable Zn-air batteries, *J. Mater. Chem. A*,  
32 2020, **8**, 9177-9184.
- 33 26. R.Y. Wang, B. Liu, S.J. You, Y. Li, Y. Zhang, D. Wang, B. Tang, Y.B. Sun and J.L.  
34 Zou, Three-dimensional Ni<sub>3</sub>Se<sub>4</sub> flowers integrated with ultrathin carbon layer with  
35 strong electronic interactions for boosting oxygen reduction/evolution reactions,  
36 *Chem. Eng. J.*, 2022, **430**, 132720.
- 37 27. F.L. Lyu, Y.C. Bai, Z.W. Li, W.J. Xu, Q.F. Wang, J. Mao, L. Wang, X.W. Zhang  
38 and Y.D. Yin, Self-Templated Fabrication of CoO-MoO<sub>2</sub> Nanocages for Enhanced  
39 Oxygen Evolution, *Adv. Funct. Mater.*, 2017, **27**, 1702324.
- 40 28. J. Kim, J.N. Heo, J.Y. Do, R.K. Chava and M. Kang, Electrochemical synergies of  
41 heterostructured Fe<sub>2</sub>O<sub>3</sub>-MnO catalyst for oxygen evolution reaction in alkaline water  
42 splitting, *Nanomaterials*, 2019, **9**, 1486.
- 43 29. L. Zhao, Y.Y. Tan, Z.Y. Zhang, W. Wu, N.C. Cheng, R.Z. Ren, S.C. Mu, X.L. Sun,  
44 Defects enriched hollow porous Co-N-doped carbons embedded with ultrafine

1 CoFe/Co nanoparticles as bifunctional oxygen electrocatalyst for rechargeable  
2 flexible solid zinc-air batteries, *Nano Res.*, 2021, **14**, 6365-6371.

3 30. B. Iqbal, M. Saleem, S.N. Arshad, J. Rashid, N. Hussain and M. Zaheer, One-Pot  
4 Synthesis of Heterobimetallic Metal-Organic Frameworks (MOFs) for  
5 Multifunctional Catalysis, *Chem. Eur. J.*, 2019, **25**, 10490-10498.

6 31. P.C. He, Y.B. Xie, Y.B. Dou, J. Zhou, A.W. Zhou, X. Wei, J.-R. Li, Partial  
7 sulfurization of a 2D MOF array for highly efficient oxygen evolution reaction, *ACS*  
8 *Appl. Mater. Inter.* 2019, **11**, 41595-41601.

9 32. H.Y. Fang, T.Z. Huang, Y. Sun, B.T. Kang, D. Liang, S. Yao, J.M. Yu, M.M.  
10 Dinesh, S. Wu, J.Y. Lee and S. Mao, Metal-organic framework-derived  
11 core-shell-structured nitrogen-doped CoCx/FeCo@ C hybrid supported by reduced  
12 graphene oxide sheets as high performance bifunctional electrocatalysts for ORR and  
13 OER, *J. Catal.*, 2019, **371**, 185-195.

14 33. Y.R. Huang, F.Y. Tian, Y.Q. Liu, M.G. Li, S.C. Xu, Y.S. Yu, J.M. Li, W.W. Yang,  
15 H.B. Li, Mesoporous cobalt ferrite phosphides/reduced graphene oxide as highly  
16 effective electrocatalyst for overall water splitting, *J. Colloid Interface Sci.*, 2022, **605**,  
17 667-673.

18 34. P.Y. Kuang, M. He, H.Y. Zou, J.G. Yu and K. Fan, 0D/3D MoS<sub>2</sub>-NiS<sub>2</sub>/N-doped  
19 graphene foam composite for efficient overall water splitting, *Appl. Catal. B*, 2019, **54**,  
20 15-25.

21 35. L.T. Yan, H.M. Jiang, Y. Wang, L.J. Li, X. Gu, P.C. Dai, D.D. Liu, S.-F. Tang,  
22 G.M. Zhao and K. Thomas, One-step and scalable synthesis of Ni<sub>2</sub>P nanocrystals  
23 encapsulated in N, P-codoped hierarchically porous carbon matrix using a bipyridine  
24 and phosphonate linked nickel metal-organic framework as highly efficient  
25 electrocatalysts for overall water splitting, *Electrochim. Acta*, 2019, **297**, 755-766.

26 36. R.H. Que, S. Liu, P. He, Y. Yang and Y.Y. Pan, Hierarchical heterostructure  
27 CoCO<sub>3</sub>@NiFe LDH nanowires array as outstanding bifunctional electrocatalysts for  
28 overall water splitting, *Mater. Lett.*, 2020, **277**, 128285.

29 37. C.L. Chen, C. Du, D. Weng, A. Mahmood, D. Feng, J.D. Wang, Mahmood, A.;  
30 Feng, D.; Wang, J. Robust superhydrophobic polytetrafluoroethylene nanofibrous  
31 coating fabricated by self-assembly and its application for oil/water separation, *ACS*  
32 *Appl. Energ. Mater.*, 2018, **1**, 2632-2639.

33 38. X.Q. Wang, B.J. Zheng, D.X. Yang, B.C. Sun, W.L. Zhang and Y.F. Chen,  
34 Self-Assembled CoFe nanoparticle-embedded carbon nanowires as efficient  
35 nonprecious catalyst for overall water splitting, *Energy Technol.*, 2019, **7**, 1801061.

36 39. P.Y. Wang, J.W. Zhu, Z.H. Pu, R. Qin, C.T. Zhang, D. Chen, Q. Liu, D.L. Wu,  
37 W.Q. Li, S.L. Liu, J.S. Xiao and S.C. Mu, Interfacial engineering of Co  
38 nanoparticles/Co<sub>2</sub>C nanowires boosts overall water splitting kinetics, *Appl. Catal. B*,  
39 2021, **296**, 120334.

40 40. Y.Y. Guo, P.F. Yuan, J.N. Zhang, H.C. Xia, F. Cheng, M.F. Zhou, J. Li, Y.Y. Qiao,  
41 S.C. Mu and Q. Xu, Co<sub>2</sub>P-CoN Double Active Centers Confined in N-Doped Carbon  
42 Nanotube: Heterostructural Engineering for Trifunctional Catalysis toward HER,  
43 ORR, OER, and Zn-Air Batteries Driven Water Splitting, *Adv. Funct. Mater.*, 2018, **28**,  
44 1805641.

- 1 41. H. Wang, H.J. Wang, H. Wan, D. Wu, G. Chen, N. Zhang, Y.J. Cao, X.H. Liu and  
2 R.Z. Ma, Ultrathin Nanosheet-Assembled Co-Fe Hydroxide Nanotubes: Sacrificial  
3 Template Synthesis, Topotactic Transformation, and Their Application as  
4 Electrocatalysts for Efficient Oxygen Evolution Reaction, *ACS Appl. Mater.*  
5 *Interfaces*, 2020, **12**, 46578-46587.
- 6 42. L.L. Huang, D.W. Chen, G. Luo, Y.-R. Lu, C. Chen, Y.Q. Zou, C.-L. Dong, Y.F. Li  
7 and S.Y. Wang, Zirconium-regulation-induced bifunctionality in 3D cobalt-iron oxide  
8 nanosheets for overall water splitting, *Adv. Mater.*, 2019, **31**, 1901439.
- 9 43. J. Shi, F. Qiu, W.B. Yuan, M.M. Guo and Z.-H. Lu, Nitrogen-doped  
10 carbon-decorated yolk-shell CoP@FeCoP micro-polyhedra derived from MOF for  
11 efficient overall water splitting, *Chem. Eng. J.*, 2021, **403**, 126312.
- 12 44. Y.C. Wu, L. Xu, W. Xin, T.T. Zhang, J.L. Cao, B.T. Liu, Q.P. Qiang, Z. Zhou, T.  
13 Han, S.X. Cao, W. Xiao and J.M. Wei, Rational construction of 3D  
14 MoNi/NiMoOx@NiFe LDH with rapid electron transfer for efficient overall water  
15 splitting, *Electrochim Acta*, 2021, **369**, 137680.
- 16 45. H. Matsushima, T. Iida and Y. Fukunaka, Observation of bubble layer formed on  
17 hydrogen and oxygen gas-evolving electrode in a magnetic field, *J Solid State*  
18 *Electrochem*, 2012, **16**, 617-623.
- 19 46. G. B. Darband, M. Aiofkhazraei, S. Shanmugam, Recent advances in methods and  
20 technologies for enhancing bubble detachment during electrochemical water splitting,  
21 *Renew. Sustain. Energ. Rev.*, 2019, **114**, 109300.
- 22
